# Supplementary material for: Usual Protein Intake Amount and Sources of Nursing Home Residents with (Risk of) Malnutrition and Effects of an Individualized Nutritional Intervention: An enable Study
Source: MDPI journal article supplement (doi:10.3390/nu13072168), 2021-06-24
Supplement: s1 [file s1]

## Supplementary Materials

**Table S1.** Intervention levels and their energy and protein content

| Level | Intervention modules                                                    | Energy<br>[kcal] | Protein<br>[g] |
|-------|-------------------------------------------------------------------------|------------------|----------------|
| 1     | Sweet protein cream                                                     | +125             | +10            |
| 2     | (Sweet <b>and</b> savoury protein cream) <b>or</b> protein-energy drink | +220-250         | +20-22         |
| 3     | Sweet protein cream <b>and</b> protein-energy drink                     | +345             | +32            |
| 4     | Sweet <b>and</b> savoury protein cream <b>and</b> protein-energy drink  | +470             | +42            |

Protein creams: 40 g per portion, Protein-energy drink: 250 mL per portion.

**Table S2.** Daily and mealtime protein intake (g) from usual food sources, plant-, animal-based sources and intervention products during usual care and intervention phase

|                     |                        | Usual care phase |      |        |           | Intervention phase |      |        |           | P-value <sup>1</sup> |
|---------------------|------------------------|------------------|------|--------|-----------|--------------------|------|--------|-----------|----------------------|
| Protein intake from |                        | Mean             | SD   | Median | IQR       | Mean               | SD   | Median | IQR       |                      |
| Day                 | Usual food             | 40.7             | 10.1 | 40.4   | 31.3-48.5 | 41.8               | 11.0 | 41.5   | 33.0-49.3 | 0.434                |
|                     | Usual food (g/kg BW/d) | 0.70             | 0.18 | 0.70   | 0.59-0.82 | 0.72               | 0.20 | 0.70   | 0.59-0.80 | 0.349                |
|                     | Plant-based            | 13.5             | 4.0  | 12.7   | 10.9-16.4 | 14.4               | 5.2  | 14.0   | 10.2-17.8 | 0.105                |
|                     | Animal-based           | 27.2             | 8.7  | 28.4   | 19.0-32.9 | 27.4               | 8.4  | 26.7   | 21.4-33.6 | 0.798                |
|                     | Intervention           |                  |      |        |           | 18.2               | 9.6  | 17.7   | 12.2-24.4 |                      |
| Breakfast           | Usual food             | 9.7              | 4.8  | 8.5    | 6.4-11.7  | 9.7                | 4.8  | 9.2    | 6.2-11.9  | 0.944                |
|                     | Plant-based            | 4.7              | 2.0  | 4.3    | 3.2-6.1   | 4.5                | 1.9  | 4.4    | 3.2-6.0   | 0.410                |
|                     | Animal-based           | 5.0              | 4.4  | 3.6    | 1.8-8.4   | 5.2                | 4.4  | 4.3    | 1.8-7.4   | 0.472                |
|                     | Intervention           |                  |      |        |           | 6.0                | 5.8  | 5.5    | 0.0-10.0  |                      |
| Lunch               | Usual food             | 12.6             | 5.6  | 11.4   | 8.4-15.6  | 13.4               | 5.2  | 12.5   | 10.2-16.3 | 0.346                |
|                     | Plant-based            | 4.1              | 2.0  | 4.0    | 2.6-5.3   | 4.6                | 2.4  | 4.3    | 3.2-5.5   | 0.237                |
|                     | Animal-based           | 8.5              | 4.9  | 8.3    | 5.4-10.8  | 8.8                | 4.5  | 8.7    | 5.6-10.5  | 0.707                |
|                     | Intervention           |                  |      |        |           | 7.4                | 4.5  | 8.0    | 3.6-10.7  |                      |
| Dinner              | Usual food             | 13.1             | 4.7  | 12.7   | 11.2-15.8 | 13.6               | 5.2  | 12.7   | 9.7-15.2  | 0.591                |
|                     | Plant-based            | 3.3              | 2.0  | 3.0    | 1.9-4.5   | 3.5                | 2.2  | 3.2    | 1.7-5.2   | 0.767                |
|                     | Animal-based           | 9.8              | 4.1  | 10.1   | 6.7-12.4  | 10.1               | 4.7  | 9.4    | 5.8-12.2  | 0.667                |
|                     | Intervention           |                  |      |        |           | 1.8                | 1.9  | 1.4    | 0.0-3.0   |                      |
| Snacks              | Usual food             | 5.3              | 2.3  | 5.0    | 4.1-6.0   | 5.1                | 2.3  | 4.8    | 4.1-5.9   | 0.667                |
|                     | Plant-based            | 1.4              | 0.9  | 1.3    | 0.8-1.7   | 1.8                | 1.2  | 1.7    | 0.9-2.6   | 0.025                |
|                     | Animal-based           | 3.9              | 2.4  | 3.5    | 2.6-5.1   | 3.4                | 2.1  | 2.9    | 2.1-4.0   | 0.080                |
|                     | Intervention           |                  |      |        |           | 3.0                | 3.2  | 2.5    | 0.0-4.0   |                      |

<sup>1</sup> Total: T-test for paired samples; Plant-/ Animal-based sources: Wilcoxon-signed rank test (n=40).

BW=Body weight, d=Day, IQR=Interquartile range, SD=Standard deviation.
